# Supplementary material for: Deep vein thrombosis
Source: HighWire-hosted journal article supplement (doi:10.1136/bmj.k351), 2018-02-22

An approach to symptoms suggestive of lower limb deep vein thrombosis (DVT)

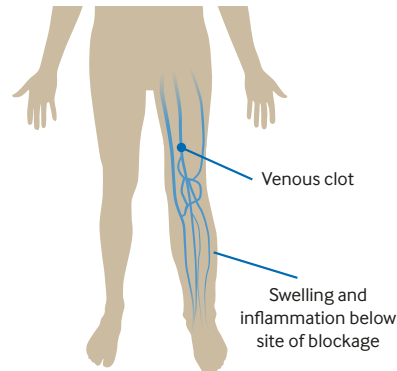

## Clinical suspicion of DVT

Common symptoms:

Swelling Redness Pain

Typically throbbing in nature, and comes on while walking or bearing weight

Patients may also be asymptomatic, having had investigation for other conditions such as pulmonary embolism or malignancy

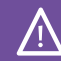

Critical features or limb threatened

## Modified Wells score (2003)

Active cancer treatment (ongoing, within 6 months, or palliative) +1

Paralysis, paresis, recent immobilisation of the lower limbs +1

Recently bedridden for more than 3 days, or major surgery within 4 weeks +1

Localised tenderness along distribution of deep venous system +1

Entire leg swelling +1

Calf swelling >3cm compared with asymptomatic leg +1

Pitting oedema (greater in symptomatic leg) +1

Collateral superficial veins (non-varicose) +1

Previous documented DVT +1

Alternative diagnosis as likely, or more likely than DVT -2

Total score: -2 -1 0 1 2 3 4 5 6 7 8 9

DVT unlikely

DVT likely

The D-dimer blood test has high sensitivity but is not very specific. D-dimer can be raised in other conditions, including:

Malignancy Infection  
Pregnancy Post surgery  
Inflammation/trauma

High/moderate sensitive D-dimer test

- Negative

+ Positive

If D-dimer not available or inappropriate

Lower limb ultrasound

- Negative

+ Positive

Proximal, above knee ultrasound is recommended in low risk cases

Either proximal or whole leg ultrasound is recommended in high risk cases

Lower limb ultrasound

- Negative

+ Positive

Discuss with specialist

Consider interim ultrasound or alternate imaging

DVT excluded

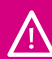

If diagnostic testing will take longer than 4 hours, begin interim anticoagulation treatment

Treat as DVT

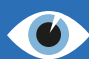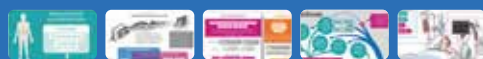

Supplement: DVT_infographic.pdf [file DVT_infographic.pdf]
